# Supplementary material
Source: Springer Nature journal article supplement (https://www.springermedizin.de/resource/supplementary/12911_2012_685_MOESM9_ESM.pdf/9526396)
Supplement: MOESM9 [file 9526396]

```
SELECT v/uid/value as composition_id,  
obs/data/origin/value as measurement_time,  
obs/data/events/data/items[at0004]/value/magnitude as systolic,  
obs/data/events/data/items[at0005]/value/magnitude as diastolic,  
c/context/setting/value as composition_setting,  
c/name/value as composition_title,  
c/context/start_time/value as composition_start_time  
FROM Ehr [uid=$current_ehr_uid]  
CONTAINS VERSION v  
CONTAINS COMPOSITION c[openEHR-EHR-COMPOSITION.encounter.v1]  
CONTAINS OBSERVATION obs[openEHR-EHR-  
OBSERVATION.blood_pressure.v1]  
WHERE obs/data/events/data/items[at0004]/value/magnitude > 185  
ORDER BY c/context/start_time/value
```
